# Supplementary material
Source: MDPI journal article supplement (https://www.mdpi.com/2073-4433/14/2/378)
Supplement: s1 [file s1 › atmosphere-2169348-supplementary.pdf]

*Supplementary*

# Spatial–Temporal Characteristics and Influencing Mechanisms of Air Quality Index by Considering COVID-19 in Yunnan, Southeastern Tibetan Plateau

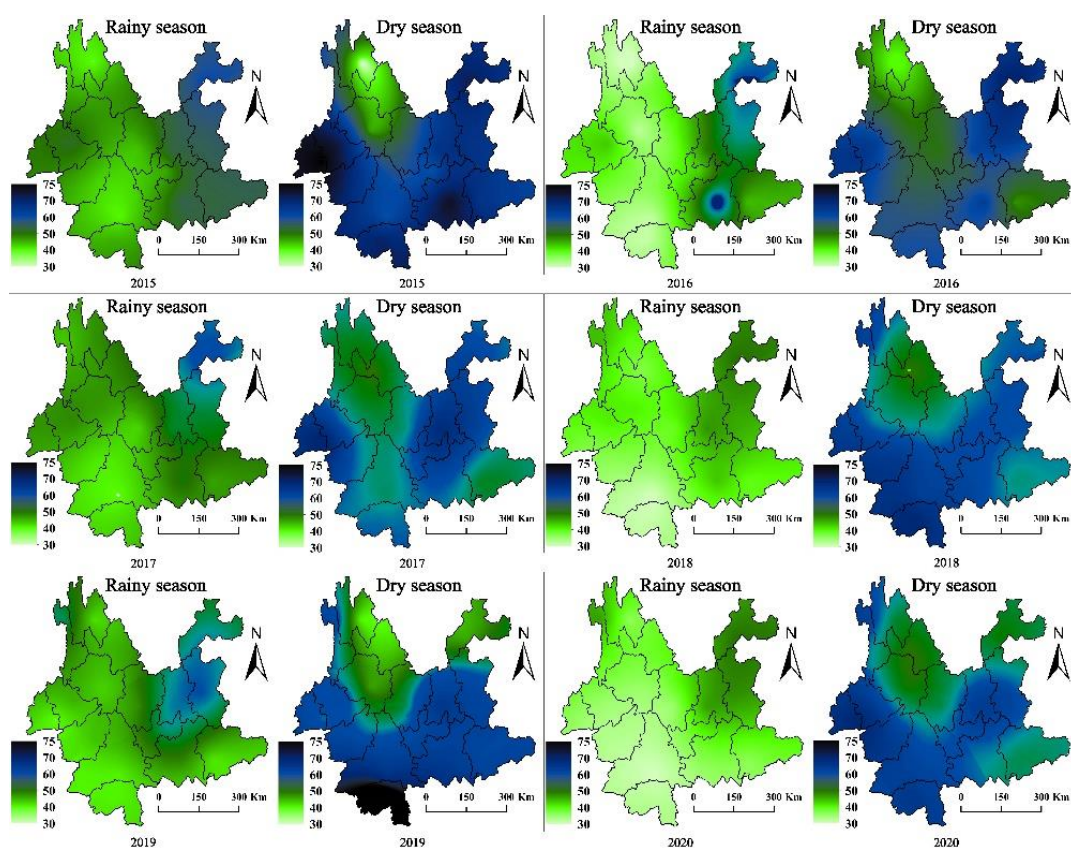

Figure S1. AQI dry-wet season distribution in Yunnan from 2015 to 2020.

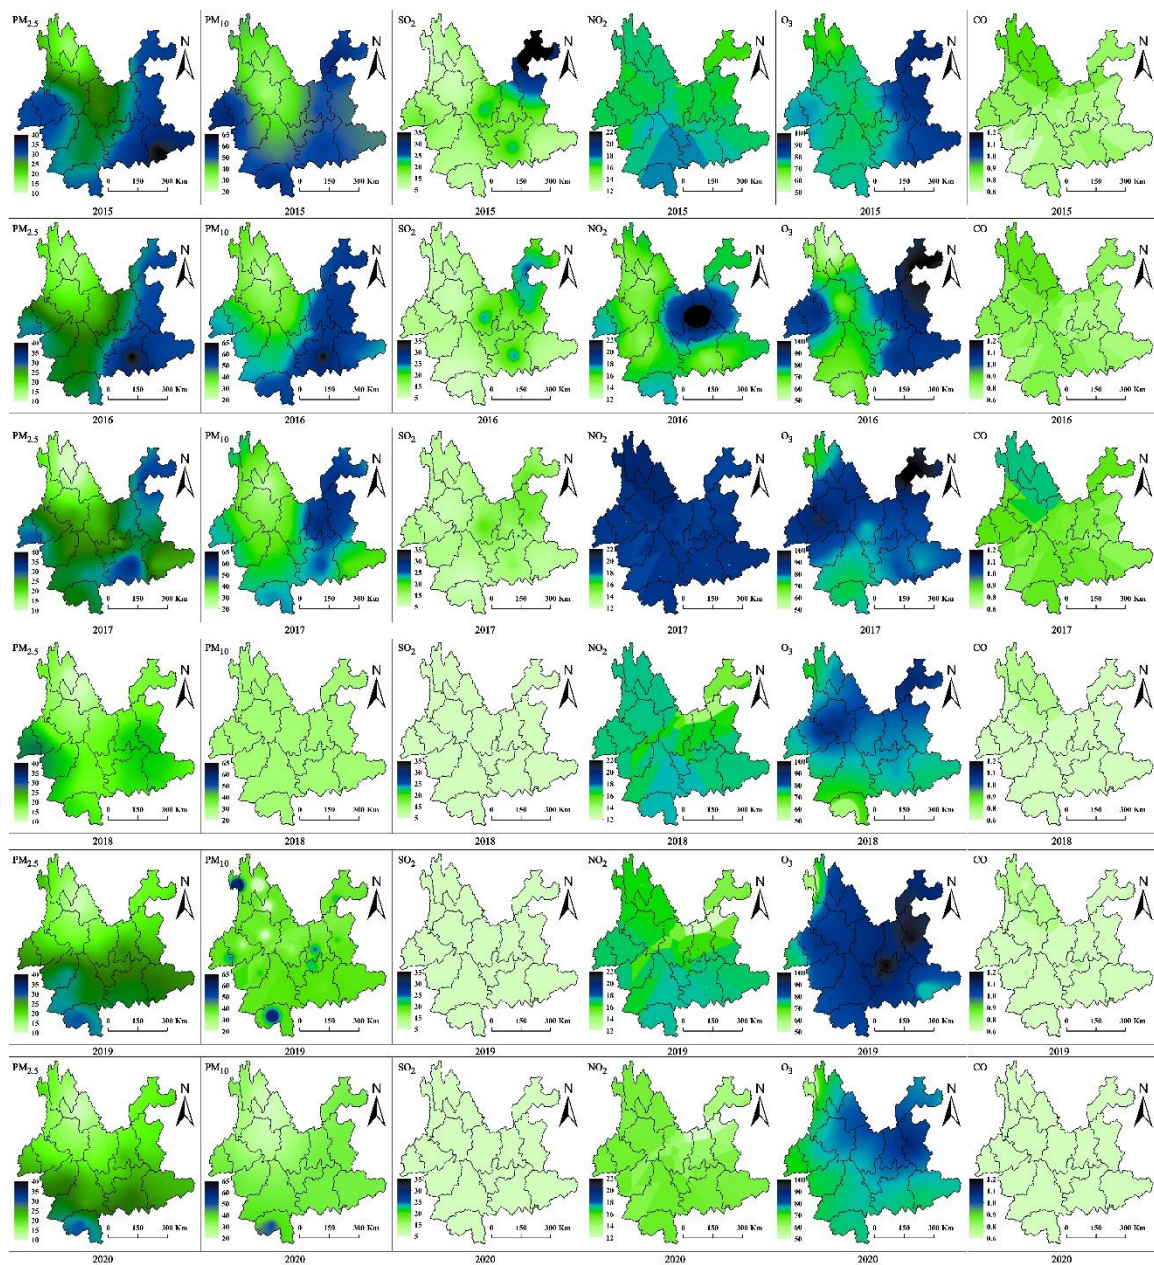

Figure S2. Spatial distribution characteristics of main pollutants in Yunnan from 2015 to 2020.
